# Supplementary material for: First asymmetric synthesis of dihydrobenzo[c]phenanthrene-1,4-quinones with helical chirality
Source: Royal Society of Chemistry journal article supplement (doi:10.1039/b103447m), 2001-01-01
Supplement: b103447m.doc [file b103447m.doc]

# *SUPPLEMENTARY MATERIAL FOR*

**First Asymmetric Synthesis of Dihydrobenzo[*c*]phenanthrenequinones with Helical Chirality**

M. Carmen Carreño, Susana García-Cerrada, M. Jesús Sanz-Cuesta, and Antonio Urbano

**Experimental Procedures**

Melting points were obtained in open capillary tubes and are uncorrected. 1H- and 13C-NMR spectra were recorded in CDCl3 at 300 and 75 MHz, respectively. All reactions were monitored by thin layer chromatography that was performed on precoated sheets of silica gel 60, and flash column chromatography was done with silica gel 60 (230-400 mesh) of Macherey-Nagel. Eluting solvents are indicated in the text. The apparatus for inert atmosphere experiments was dried by flaming in a stream of dry argon. CH2Cl2 was dried over P2O5. Dry THF was distilled from sodium/benzophenone ketyl. All other reagent quality solvents were used without purification. For routine workup, hydrolysis was carried out with water, extractions with CH2Cl2, and solvent drying with MgSO4.

**4-*tert-*Butyl-6-methoxy-1,2-dihydronaphthalene (2).** To a solution of 7-methoxy-1-tetralone (3.00 g, 17.02 mmol) in Et2O (8 mL), *t*-BuMgCl 2.0 M in Et2O (17 mL, 34.04 mmol) was slowly added at rt under argon. After 48 h at rt, the mixture was hydrolysed at 0 oC with 100 mL of 10% HCl and stirred for 30 min at rt. The organic layer was extracted with Et2O, washed with water and saturated aqueous solution of NaHCO3 and dried over MgSO4. After workup and flash chromatography (eluent EtOAc/hexane 1:20), 1-*tert-*butyl-7-methoxy-1,2,3,4-tetrahydronaphthalen-1-ol was obtained in 56% yield as a white solid: mp 53-55 ºC (CH2Cl2/pentane); 1H-RMN 0.97 (s, 9H), 1.51 (m, 1H); 1.83 (m, 2H), 1.87 (broad s, 1H), 2.28 (ddd, 1H, *J* = 3.4, 10.5 and 15.3 Hz), 2.51 (ddd, 1H, *J* = 4.5, 9.1 and 15.3 Hz), 2.65 (dt, 1H, *J* = 15.0 and 4.5 Hz), 3.78 (s, 3H), 6.73 (dd, 1H, *J* = 2.6 and 8.3 Hz), 6.99 (d, 1H, *J* = 8.3 Hz), 7.20 (d, 1H, *J* = 2.6 Hz); 13C-RMN 21.2, 25.8, 29.7, 36.7, 39.9, 55.1, 76.1, 112.6, 113.8, 128.7, 146.3, 146.3, 156.9; EI-MS *m/z* (%):91(6), 121 (22), 159 (8), 177 (100), 234 (M+, 10). HRMS (EI): calcd for C15H22O2 234.16198; found: 234.16193.

To a solution of the above synthesized carbinol (50 mg, 0.21 mmol) in benzene (1 mL), 0.11 mL of 10% H2SO4 were added. After 1 h at reflux, the reaction mixture was treated at rt with saturated aqueous solution of NaHCO3 and water. After workup and flash chromatography (eluent EtOAc/hexane 1:40), compound **2** was obtained in 85% yield as a yellow oil: 1H-RMN 1.36 (s, 9H), 2.15 (dt, 2H, *J* = 4.8 and 8.1 Hz), 2.57 (t, 2H, *J* = 8.1 Hz), 3.81 (s, 3H), 6.12 (t, 1H, *J* = 4.8 Hz), 6.68 (dd, 1H, *J* = 2.6 and 8.3 Hz), 7.09 (d, 1H, *J* = 8.3 Hz), 7.24 (d, 1H, *J* = 2.6 Hz); 13C-RMN  23.8, 28.3, 31.0, 34.9, 55.2, 109.7, 113.2, 124.7, 127.9, 130.7, 135.6, 144.7, 157.4; EI-MS *m/z* (%): 69 (33), 84 (55), 105 (32); 115 (41), 128 (28), 149 (25), 159 (85), 175 (39), 189 (25), 201 (46), 216 (M+, 100). HRMS (EI): calcd for C15H20O 216.15141; found: 216.15199.

**8-*tert-*Butyl-2-methoxynaphthalene (3).** To a solution of **2** (0.77 g, 3.60 mmol) in CH2Cl2 (25 mL), DDQ (0.98 g, 4.30 mmol) in CH2Cl2 (25 mL) was added at rt. After 10 min, the mixture was diluted with CH2Cl2 and washed several times with water. After workup and flash chromatography (eluent EtOAc/hexane 1:20), compound **3** was obtained in 99% yield as a yellow oil: 1H-RMN1.68 (s, 9H), 3.98 (s, 3H), 7.19 (dd, 1H, *J* = 2.2 and 8.9 Hz), 7.30 (t, 1H, *J* = 7.6 Hz), 7.53 (dd, 1H, *J* = 1.1 and 7.3 Hz), 7.68 (broad d, 1H, *J* = 7.9 Hz), 7.81 (d, 1H, *J* = 2.3 Hz), 7.80 (d, 1H, *J* = 8.9 Hz); 13C-RMN  31.4, 35.8, 55.2, 106.8, 116.6, 123.0, 123.7, 127.1, 130.4, 130.9, 132.4, 144.5, 156.2; EI-MS *m/z* (%): 57 (73), 71 (41), 84 (25), 105 (10), 113 (17), 149 (100), 167 (42), 199 (28), 214 (M+, 14). HRMS (EI): calcd for C15H18O 214.13637; found: 214.13576.

**8-*tert*-Butyl-3,4-dihydro-1*H*-naphthalen-2-one (4).** To a solution of **3** (0.63 g, 2.96 mmol) in EtOH (50 mL), small pieces of sodium (2.04 g, 88.80 mmol) were added. The mixture was refluxed for 5-8 h, cooled to 0ºC and stirred with 35% HCl until acid pH. After dilution with CH2Cl2, washing with H2O and brine and workup, the residue was purified by flash chromatography (eluent EtOAc/hexane 1:9) to obtain compound **4** in 99% yield as a yellow solid: mp 43-45 oC (CH2Cl2/pentane); 1H-RMN 1.41 (s, 9H), 2.48 and 3.06 (2t, 4H, *J* = 6.7 Hz), 3.89 (s, 2H), 7.12 (dd, 1H, *J* = 2.0 and 7.5 Hz), 7.17 (t, 1H, *J* = 7.5 Hz), 7.33 (dd, 1H, *J* = 2.0 and 7.5 Hz); 13C-RMN 29.3, 31.2, 35.3, 36.9, 45.7, 124.7, 125.7, 126.3, 131.4, 138.9, 147.7, 211.4; EI-MS *m/z* (%): 55 (21), 77 (36), 91 (66), 115 (100), 129 (88), 143 (54), 161 (93), 183 (76), 202 (M+, 84). HRMS (EI): calcd for C14H18O 202.13576; found: 202.13628.

**5-*tert-*Butyl-3-vinyl-1,2-dihydronaphthalene (5).** To a solution of tetralone **4** (140 mg, 0.70 mmol) and Tf2NPh (307 mg, 0.84 mmol) in dry THF (7 mL) at –78 ºC, KHMDS 0.5M in toluene (2.12 mL, 1.05 mmol) was added under argon. After 2 h at –78 ºC, the mixture was hydrolyzed with H2O and extracted with ethyl ether. After workup and flash chromatography (eluent hexane) the corresponding enol triflate was obtained in 91% yield as a white solid: mp 26-27 ºC (hexane); 1H-RMN 1.42 (s, 9H), 2.63 and 3.03 (2t, 4H, *J* = 7.9 Hz), 7.02 (dd, 1H, *J* = 2.0 and 7.5 Hz), 7.13 (t, 1H, *J* = 7.3 Hz), 7.17 (s, 1H), 7.28 (dd, 1H, *J* = 2.0 and 7.5 Hz); 13C-RMN  25.8, 29.9, 31.6, 35.2, 118.3, 119.1, 124.7, 125.9, 127.9, 128.9, 134.8, 146.9, 149.0; EI-MS *m/z* (%): 69 (100), 91 (18), 115 (49), 129 (45), 143 (26), 157 (56), 183 (88), 317 (19), 334 (M+, 40). HRMS (EI): calcd for C15H17F3O3S 334.08505; found: 334.08548.

To a solution of the above synthesized enol triflate (110 mg, 0.36 mmol), Pd(PPh3)4 (18 mg, 0.02 mmol) and LiCl (69 mg, 1.62 mmol) in dry THF (4 mL), tributylvinylstannane (105 μL, 0.36 mmol) was added under argon. After refluxing for 2 h, the mixture was diluted with hexane and the organic layer was succesively washed with saturated aqueous solution of 10% NH4OH, H2O and finally with brine. After workup and flash chromatography (eluent pentane), compound **5** was obtained in 44% yield as a white solid: mp 54-56 ºC (CH2Cl2/hexane); 1H-RMN 1.55 (s, 9H), 2.48 and 2.91 (2t, 4H, *J* = 8.3 Hz), 5.24 (d, 1H, *J* = 10.7 Hz), 5.44 (d, 1H, *J*= 17.4 Hz), 6.72 (dd, 1H, *J* = 10.7 and 17.4 Hz), 7.10 (dd, 1H, *J* = 1.6 and 7.3 Hz), 7.15 (t, 1H, *J* = 7.3 Hz), 7.19 (s, 1H), 7.33 (dd, 1H, *J* = 1.8 and 7.7 Hz); 13C-RMN 21.5, 29.4, 31.7, 35.4, 112.4, 124.1, 125.7, 126.4, 127.9, 132.3, 136.8, 137.6, 139.2, 145.7; EI-MS *m/z* (%): 115 (9), 128 (16), 141 (20), 155 (45), 169 (22), 197 (42), 212 (M+, 100). HRMS (EI): calcd for C16H20 212.15650; found: 212.15742.

**(-)-*(R)-*12-*tert*-Butyl-5,7,8,12b-tetrahydrobenzo[*c*]phenanthrene-1,4-dione (7).** To a solution of diene **5** (25.0 mg, 0.16 mmol) in CH2Cl2 (2 mL), (S*S*)-2-(*p*-tolylsulfinyl)-1,4-benzoquinone18 (78.7 mg, 0.32 mmol) in CH2Cl2 (2 mL) was added at rt under argon. After 7 days, the solvent was evaporated and a 25:15:60 mixture of **7**, **8** and **9** was obtained. Compound **7** was obtained after flash chromatography (eluent EtOAc/hexane 1:12) as a red solid in 14% yield: mp 188-189 ºC (CH3CN); []20D = -240 (*c* 0.024, CHCl3); ee: 72% [HPLC; chiral column *Daicel Chiralpack* AS, (eluent hexane/2-propanol 97:3), flow: 0.7 mL/min, Rt = 7.4 min (*S* enantiomer) and 8.4 min (*R* enantiomer)]; 1H-RMN  1.32 (s, 9H), 2.24 (m, 1H), 2.41 (dt, 1H, *J* = 13.9 and 3.1 Hz), 2.51 (ddd, 1H, *J* = 4.2, 9.5 and 18.8 Hz), 2.64 (dt, 1H, *J* = 3.0 and 13.2 Hz), 3.75 (dt, 1H, *J* = 3.2 and 14.3 Hz), 3.81 (ddd, 1H, *J* = 1.3, 6.6 and 18.8 Hz), 4.63 (d, 1H, *J* = 8.8 Hz), 5.91 (dq, 1H, *J* = 6.6 and 2.0 Hz), 6.37 and 6.61 (AB system, 2H, *J* = 7.3 Hz), 7.06 (d, 1H, *J* = 7.3 Hz), 7.23 (d, 1H, *J* = 7.4 Hz), 7.36 (dt, 1H, *J* = 1.1 and 8.1 Hz); 13C-RMN 25.4, 31.4, 31.8, 32.1, 36.0, 42.8, 119.0, 124.8, 126.3, 133.1, 134.5, 137.0, 141.9, 145.8 (2C), 146.4, 147.3, 147.7, 184.9, 185.6; EI-MS *m/z* (%): 57 (100), 115 (6), 189 (8), 202 (12), 233 (9), 245 (6), 262 (73), 320 (M+ +2, 16). HRMS (EI): calcd for C22H22O2 318.16198; found: 318.16116.

**(+)-(*P*)*-*12-*tert*-Butyl-7,8-dihydrobenzo[*c*]phenanthrene-1,4-dione (8).** Compound **8** was obtained as above, after flash chromatography (eluent EtOAc/hexane 1:12), as a brown solid in 10% isolated yield: mp 172-174 ºC (CH3CN); []20D =+371 (*c* 0.017, CHCl3); ee:72% [HPLC; chiral column *Daicel Chiralpack* AS, (eluent hexane/2-propanol 99:1), flow: 0.3 mL/min, Rt = 29.5 min (*P* enantiomer) and 36.1 (*M* enantiomer)]; 1H-RMN 1.32 (s, 9H), 2.57 and 2.79 (2m, 4H), 6.77 and 6.91 (AB system, 2H, *J* = 10.3 Hz), 7.16 (d, 1H, *J* = 7.5 Hz), 7.27 (t, 1H, *J* = 7.1 Hz), 7.57 (d, 1H, *J* = 7.8 Hz), 7.57 and 7.98 (AB system, 2H, *J* = 7.9 Hz); EI-MS *m/z* (%): 55 (35), 57 (66), 69 (36), 71 (27), 83 (19), 121 (16), 149 (39), 202 (13), 229 (35), 260 (78), 316 (M+, 100). HRMS (EI): calcd for C22H20O2 316.14663; found: 316.14612.

**(+)*-*12-*tert*-Butyl-2- or 3-(*p*-tolylsulfinyl)-4a,5,7,8,12b,12c-hexahydrobenzo[*c*]phenanthrene-1,4-dione (9).** Compound **9** was obtained as above after flash chromatography (eluent EtOAc/hexane 1:4) as a mixture of regio- and/or diastereoisomers in 30% isolated yield. After crystallisation from hexane, one pure isomer, whose exact structure is not known, was obtained as a pale yellow solid: mp 160-162 ºC (hexane); []20D =+500 (*c* 0.008, CHCl3); 1H-RMN 1.42 (s, 9H), 2.08, 2.13, 2.26 and 2.35 (4m, 4H), 2.39 (s, 3H), 2.78 (ddd, 1H, *J* = 2.4, 5.0 and 15.0 Hz), 3.13 (ddd, 1H, *J* = 5.0, 8.1 and 15.0 Hz), 3.42 (ddd, 1H, *J* = 5.0, 8.1 and 9.6 Hz), 3.65 (d, 1H, *J* = 6.6 Hz), 4.28 and 5.10 (2m, 2H), 6.98 (d, 1H, *J* = 7.3 Hz), 7.04 (s, 1H), 7.09 (t, 1H, *J* = 7.3 Hz), 7.32 (dd, 1H, *J* = 1.0 and 8.1 Hz), 7.27 and 7.56 (AA´BB´ system, 4H, *J* = 8.5 Hz); 13C-RMN  21.5, 25.2, 32.5, 32.6, 33.7, 37.5, 38.3, 50.4, 55.4, 114.9, 125.5, 125.7, 126.4, 127.3, 130.1, 134.0, 135.5, 137.7, 140.7, 142.4, 142.7, 147.1, 156.7, 194.6, 196.5; EI-MS *m/z* (%): 91 (13), 155 (31), 212 (100), 231 (15), 248 (36), 318 (6), 458 (M+, 7); HRMS (EI): calcd for C29H30SO3 458.19157; found: 458.19113.

**5-*tert*-Butyl-3-(1-ethoxyvinyl)-1,2-dihydronaphthalene (10).** To a solution of tetralone **4** (0.14 g, 0.70 mmol) and Tf2NPh (307 mg, 0.84 mmol) in dry THF (7 mL) at –78 ºC, KHMDS 0.5M in toluene (2.1 mL, 1.05 mmol) was added under argon. After 2 h at –78 ºC, the mixture was hydrolyzed with H2O and extracted with ethyl ether. After workup and flash chromatography (eluent hexane) the corresponding enol triflate was obtained in 91% yield. To a solution of this enol triflate (0.11 g, 0.28 mmol), Pd(PPh3)4 (14 mg, 0.01 mmol) and LiCl (61.0 mg, 1.43 mmol) in dry THF (2 mL), tributyl(1-ethoxyvinyl)stannane (94 μL, 0.28 mmol) was added under argon. After refluxing for 2 h, the mixture was diluted with hexane and the organic layer was succesively washed with saturated aqueous solution of 10% NH4OH, H2O and finally with brine. After workup and flash chromatography on Al2O3 (eluent pentane), compound **10** was obtained in 50% yield as a very unstable oil: 1H-RMN 1.43 (t, 3H, *J* = 6.9 Hz),1.46 (s, 9H), 2.41 and 2.83 (2t, 4H, *J* = 7.9 Hz), 3.89 (q, 2H, *J* = 6.9 Hz),4.23 (d, 1H, *J*= 2.6); 5.44 (t, 1H, *J* = 2.6 Hz), 7.02 (dd, 1H, *J* = 1.2 and 7.7 Hz), 7.07 (t, 1H, *J* = 7.5 Hz), 7.25 (dd, 1H, *J* = 1.4 and 7.7 Hz), 7.71 (s, 1H); EI-MS *m/z* (%): 84 (22), 115 (32), 128 (61), 141 (52), 153 (44), 169 (72), 185 (9), 213 (100), 228 (19), 243 (60), 256 (M+, 17); HRMS (EI): calcd for C18H24O 256.18272; found: 256.18287.

**(+)-(*P*)*-*12-*tert*-Butyl-6-ethoxy-7,8-dihydrobenzo[*c*]phenanthrene-1,4-dione (12).** To a solution of diene **10** (19.0 mg, 0.07 mmol) in CH2Cl2 (1 mL), (S*S*)-2-(*p*-tolylsulfinyl)-1,4-benzoquinone18 (36.5 mg, 0.15 mmol) in CH2Cl2 (1 mL) was added at –20 oC under argon. After 3 days at –20 oC, the solvent was evaporated and the residue was purified by flash chromatography (eluent EtOAc/hexane 1:20) to obtain pure **12** as an orange solid in 57% yield: mp 118-120 ºC (CH3CN); []20D =+1077 (*c* 0.019, CHCl3); ee:88% [HPLC; chiral column *Daicel Chiralcel* OD, (eluent hexane/2-propanol 90:10), flow: 0.5 mL/min, Rt = 14.0 min (*P* enantiomer) and 15.6 min (*M* enantiomer)]; 1H-RMN 1.06 (s, 9H**)**,1.52 (t, 3H, *J* = 7.1 Hz), 2.11 (dt, 1H, *J* = 4.5 and 14.7 Hz), 2.47 (dt, 1H, *J* = 4.4 and 14.7 Hz), 2.73 (ddd, 1H,*J* = 2.2, 4.2 and 15.1 Hz), 3.30 (ddd, 1H, *J* = 2.2, 3.6 and 14.7 Hz), 4.25 (dq, 2H, *J* = 20.0 and 7.1 Hz), 6.68 and 6.81 (AB system, 2H, *J* = 10.1 Hz), 7.14 (d, 1H, *J* = 7.1 Hz), 7.25 (t, 1H, *J* = 7.7 Hz), 7.37 (d, 1H, *J* = 8.0 Hz), 7.48 (s, 1H); 13C-RMN 14.7, 23.1, 31.2, 33.9, 37.5, 64.5, 106.9, 123.8, 127.0, 127.2, 129.3, 130.1, 131.7, 132.1, 136.3, 137.2, 140.1, 141.0, 149.4, 157.9, 184.0, 185.6; EI-MS *m/z* (%): 71 (10), 85 (6), 189 (12), 229 (6), 247 (10), 275 (55), 303 (100), 362 (M+ +2, 4); HRMS (EI): calcd for C24H24O3 360.17254; found: 360.17126.

**Helicenes (*P*)-13 and (*M*)-14.** Et3N (91 L) and CH2Cl2 (1.5 mL) were added to a mixture of helicene ()-**12** (11 mg, 0.03 mmol), activated Zn (26.4 mg, 0.39 mmol), (-)-camphanoyl chloride (36 mg, 0.15 mmol) and DMAP (2 mg, 0.017 mmol) under argon. The mixture was refluxed for 1 h. Filtration through Celite, aided by several ethyl acetate washes, removed remaining Zn. The organic solution was washed with saturated aqueous NaHCO3, 2% HCl and water, dried with MgSO4 and evaporated. Purification by flash chromatography (eluent EtOAc/hexane 1:2) yielded 42% of the lower Rf (0.34) isomer, **(*P*)-13**, and 40% of the higher Rf (0.42) isomer, **(*M*)-14**.

**(*P*)-13**: []20D =+92 (*c* 0.16, CHCl3); 1H-RMN (500 MHz) 0.80 (s, 3H), 0.81 (s, 9H), 1.05 (s, 3H), 1.08 (s, 3H), 1.23 (s, 6H), 1,24 (s, 3H), 1.51 (t, 3H, *J* = 7.0 Hz), 1.40, 1.56, 1.79, 1.85, 1.91, 2.06, 2.14 (7m, 7H), 2.32 (dt, 1H, *J* = 4.5 and 9.0 Hz), 2.52 (m, 1H), 2.67 (m, 2H), 3.24 (ddd, 1H, *J* = 2.0, 4.0 and 16.0 Hz), 4.12 and 4.24 (2dq, 2H, *J* = 9.1 and 7.0 Hz), 6.75 and 7.23 (AB system, 2H, *J* = 8.2 Hz), 7.13 (d, 1H, *J* = 7.2 Hz), 7.18 (s, 1H), 7.18 (t, 1H, *J* = 7.1 Hz), 7.41 (dd, 1H, *J* = 1.3 and 8.0 Hz); 13C-RMN (125 MHz) 10.0, 10.1, 15.2, 17.3, 17.3, 17.5, 24.0, 29.4 (2C), 29.5, 30.1, 31.6, 32.2, 32.9, 37.5, 54.9, 55.0, 55.4, 64.3, 91.1, 91.5, 98.8, 115.6, 116.8, 123.9, 125.9, 126.9, 127.9, 128.2, 134.0, 134.6, 136.1, 142.2, 143.6, 144.6, 149.5, 155.6, 164.9, 166.3, 178.2 (2C); FAB-MS *m/z* (%): 57 (100), 83 (72), 97 (33), 107 (34), 137 (60), 154 (73), 275 (19), 303 (12), 399 (16), 667 (14), 722 (M+, 69); HRMS (FAB): calcd for C44H50O9 722.34548; found: 722.34521.

**(*M*)-14**: []20D = -116 (*c* 0.12, CHCl3); 1H-RMN (500 MHz) 0,81 (s, 3H), 0.87 (s, 9H), 0.97, 1.07, 1.22, 1.23 and 1.24 (5s, 15H), 1.41 (m, 1H), 1.54 (t, 3H, *J* = 7.0 Hz), 1.55, 1.73, 1.85, 1.87, 2.08 2.19 (6m, 6H), 2.34 (dt, 1H, *J* = 4.5 and 9.0 Hz), 2.46 (m, 1H), 2.70 (m, 2H), 3.30 (ddd, 1H, *J* = 2.0, 4.0 and 16.0), 4.14 and 4.24 (2dq, 2H, *J* = 9.1 and 7.0 Hz), 6.79 and 7.24 (AB system, 2H, *J* = 8.2 Hz), 7.03 (d, 1H, *J* = 7.2 Hz), 7.19 (t, 1H, *J* = 7.1 Hz), 7.21 (s, 1H), 7.52 (ddd, 1H, *J* = 0.6, 1.3 and 8.0 Hz); EI-MS *m/z* (%): 55 (21), 83 (61), 97 (20), 125 (13), 137 (14), 275 (19), 303 (35), 484 (14), 722 (M+, 100); HRMS (EI): calcd for C44H50O9 722.34548; found: 722.34772.
